# Supplementary material for: Pneumococcal Pneumonia and Invasive Pneumococcal Disease in Those 65 and Older: Rates of Detection, Risk Factors, Vaccine Effectiveness, Hospitalisation and Mortality
Source: MDPI journal article supplement (doi:10.3390/geriatrics6010013), 2021-02-04
Supplement: s1 [file s1]

**Table 1. Data sources**

| Author and date                                         | Data source                                                                                                                                                                                                                                                                                  |
|---------------------------------------------------------|----------------------------------------------------------------------------------------------------------------------------------------------------------------------------------------------------------------------------------------------------------------------------------------------|
| Section 3.1 Literature review                           |                                                                                                                                                                                                                                                                                              |
| Remschmidt 2016 [8]                                     | Systematic review                                                                                                                                                                                                                                                                            |
| Falkenhorst 2017 [9]                                    | Systematic review                                                                                                                                                                                                                                                                            |
| Berold 2018 [10]                                        | Systematic review                                                                                                                                                                                                                                                                            |
| Section 3.2 Prevalence of pneumococcal disease          |                                                                                                                                                                                                                                                                                              |
| US Centers for Medicare and Medicaid Services 2020 [13] | National database                                                                                                                                                                                                                                                                            |
| Chalmers 2016 [14]                                      | Systematic review                                                                                                                                                                                                                                                                            |
| Van Hoek 2012 [15]                                      | National data bases (Health and Protection Agency, UK)                                                                                                                                                                                                                                       |
| Waight 2015 [16]                                        | Observational cohort study                                                                                                                                                                                                                                                                   |
| LeBlanc 2019 [17]                                       | National database (Canadian Immunization Research network)                                                                                                                                                                                                                                   |
| Desmet 2021 [18]                                        | National database (Belgian laboratory-based surveillance of invasive pneumococcal disease)                                                                                                                                                                                                   |
| Section 3.3 Pneumococcal vaccination rates              |                                                                                                                                                                                                                                                                                              |
| US Centers for Disease Control 2020 [19]                | National database (Vaccination Coverage Among Adults Aged 65 and Over: United States, 2015)                                                                                                                                                                                                  |
| Shen 2019 [20]                                          | National database (Vaccination Medicare fee-for-service beneficiaries)                                                                                                                                                                                                                       |
| Black 2017 [21]                                         | National databases (Centers for Medicare and Medicaid Services: CMS) Minimum Data Set (MDS). Influenza and pneumococcal vaccination status assessed for all residents of CMS-certified nursing homes using data reported to the MDS by all certified facilities                              |
| Vila-Corcoles 2019 [22]                                 | Database, Autonomous Region of Catalonia, Spain                                                                                                                                                                                                                                              |
| Wang 2020 [23]                                          | Retrospective cohort study of 3 databases (Shanghai Chronic Disease Management Information System, Shanghai Immunization Program Information System, Hospital Record System at Shanghai Health Commission for Hospital Records)                                                              |
| Djennad 2019 [24]                                       | National database (Public Health England, national surveillance of IPD)                                                                                                                                                                                                                      |
| Naito 2020 [25]                                         | National databases (5-year Japanese national PPV23 immunization program; number of vaccines shipped to each municipality by pharmaceutical company MSD K.K. (Tokyo); Annual number of individuals $\geq 65$ years, Statistics Bureau of the Ministry of Internal Affairs and Communications) |

|                                 |                                                                                                                  |
|---------------------------------|------------------------------------------------------------------------------------------------------------------|
| Murakami 2019 [26]              | Postal and web-based nationwide survey to all municipalities in Japan, June 2016 (n=1741)                        |
| Public Health England 2018 [27] | National database (Pneumococcal polysaccharide vaccine (ppv) coverage report, England, April 2017 to March 2018) |
| Dyda 2016 [28]                  | Systematic review                                                                                                |
| Yang 2016 [29]                  | Analysis of introduction of PPV23 for seniors into Korean national immunization program May 2013                 |

### Section 3.4 Detection of pneumococcal pathogens in adults hospitalised for CAP

|                   |                                                          |
|-------------------|----------------------------------------------------------|
| Isturiz 2019 [30] | Prospective cohort study (212 hospitals in 10 US states) |
| Daniel 2018 [31]  | Prospective cohort study (2 hospitals in Nottingham, UK) |
| Htar 2017 [32]    | Systematic review                                        |

### 3.5. Effect of vaccination on antibiotic resistance to medications used for pneumococcal disease

|                |                   |
|----------------|-------------------|
| Htar 2017 [33] | Systematic review |
|----------------|-------------------|

### 3.6. Effect of vaccination on IPD caused by antibiotic-resistant pneumococcus

|                     |                                                      |
|---------------------|------------------------------------------------------|
| Htar 2019 [34]      | Systematic review                                    |
| Vadlamudi 2019 [35] | Systematic review                                    |
| Vestjens [36]       | National database (Netherlands Reference Laboratory) |

### 3.7. The effect of pneumococcal vaccination on carriage rates in those $\geq 65$

|                       |                                            |
|-----------------------|--------------------------------------------|
| Van Deursen 2018 [37] | RCT (CAPiTA trial , Netherlands)           |
| Azarian 2018 [38]     | 3 prospective observational cohort studies |

### 3.8. Persistence of immunity following conjugate and polysaccharide vaccination in seniors

|                                          |     |
|------------------------------------------|-----|
| MacIntyre 2019 [39]                      | RCT |
| Musher 2010 [40]                         | RCT |
| Clutterbuck 2012 [41], Lazarus 2011 [42] | RCT |
| Lode 2011 [43]                           | RCT |
| Namkoong 2015 [44]                       | RCT |

### 3.9. Effect of pneumococcal vaccination on the incidence of pneumococcal pneumonia, invasive pneumococcal disease, hospitalization and death

|                        |                          |
|------------------------|--------------------------|
| Hechter 2012 [45]      | Prospective cohort study |
| Webber 2014 [46]       | RCT                      |
| Ochoa-Gondar 2014 [47] | Prospective cohort study |
| Maruyama 2010 [48]     | RCT                      |

### 3.10. Studies which performed analyses controlling for risk factors

|                |                                                                                                                                         |
|----------------|-----------------------------------------------------------------------------------------------------------------------------------------|
| Tsai 2015 [51] | National databases (Taiwan National Health Insurance Research Database; Taiwan Ministry of Health Cause-of-Death Registration Database, |
|----------------|-----------------------------------------------------------------------------------------------------------------------------------------|

|                 |                                                                   |
|-----------------|-------------------------------------------------------------------|
|                 | and Invasive Pneumococcal Disease (IPD)<br>Notification Database) |
| Suaya 2018 [52] | RCT (CAPiTA trial, Netherlands)                                   |

3.11 Studies which performed stratified analyses by age groups 65-74, 75-84, 85-89, and 90+

|                         |                                 |
|-------------------------|---------------------------------|
| Van Werkhoven 2013 [53] | RCT (CAPiTA trial, Netherlands) |
|-------------------------|---------------------------------|
